# Supplementary material for: Pain Education in the Wellness, Training Performance, and Pain Intensity of Youth Athletes: An Experimental Study
Source: MDPI journal article supplement (doi:10.3390/healthcare12020215), 2024-01-16
Supplement: s1 [file s1]

Table S1 Wellness and pain intensity of female athletes

|                 | Control Group |              |                         |    | Intervention Group |              |                         |      | Between-group differences |    |
|-----------------|---------------|--------------|-------------------------|----|--------------------|--------------|-------------------------|------|---------------------------|----|
|                 | PRE           | POST         | Intra-group differences |    | PRE                | POST         | Intra-group differences |      |                           |    |
|                 | Mean (SD)     | Mean (SD)    | Mean (95%CI)            | ES | Mean (SD)          | Mean (SD)    | Mean (95%CI)            | ES   | Mean (95%CI)              | ES |
| Pain intensity  | 3.00 (1.00)   | 4.50 (1.80)  | -1.50 (-7.95; 4.95)     | NS | -                  | -            | -                       | -    | 1.57 (-0.08; 3.22)        | NS |
| Sleep           | 3.64 (1.59)   | 3.28 (1.49)  | 0.36 (-0.89; 1.61)      | NS | 3.15 (1.62)        | 3.84 (1.34)  | -0.69 (-1.48; 0.10)     | NS   | -0.56 (-1.69; 0.56)       | NS |
| Stress          | 3.50 (1.51)   | 3.92 (1.21)  | -0.43 (-1.06; 0.20)     | NS | 4.69 (1.84)        | 3.77 (1.36)  | 0.92 (0.17; 1.82)*      | 0.46 | 0.16 (-0.86; 1.18)        | NS |
| Fatigue         | 4.14 (1.17)   | 3.85 (1.35)  | 0.28 (-0.24; 0.81)      | NS | 4.38 (0.77)        | 4.31 (0.85)  | 0.07 (-0.64; 0.79)      | NS   | -0.45 (-1.35; 0.45)       | NS |
| Muscle soreness | 3.92 (1.33)   | 4.28 (1.43)  | -0.35 (-1.54; 0.83)     | NS | 4.00 (1.15)        | 3.46 (1.33)  | 0.53 (-0.53; 1.60)      | NS   | 0.82 (0.53; -0.27)        | NS |
| Wellness        | 15.21 (3.55)  | 15.35 (3.20) | -0.14 (-2.08; 1.80)     | NS | 16.23 (3.03)       | 15.38 (2.98) | 0.84 (-0.43; 2.12)      | NS   | -0.27 (-2.48; 2.42)       | NS |

CI, confidence interval; ES, effect size; NS, non-significant; SD, standard deviation; \*p < 0.05

Table S2 Wellness and pain intensity of male athletes.

|                 | Control Group |              |                         |    | Intervention Group |              |                         |    | Between-group differences |    |
|-----------------|---------------|--------------|-------------------------|----|--------------------|--------------|-------------------------|----|---------------------------|----|
|                 | PRE           | POST         | Intra-group differences |    | PRE                | POST         | Intra-group differences |    |                           |    |
|                 | Mean (SD)     | Mean (SD)    | Mean (95%CI)            | ES | Mean (SD)          | Mean (SD)    | Mean (95%CI)            | ES | Mean (95%CI)              | ES |
| Pain intensity  | 4.00 (1.41)   | 7.50 (0.70)  | -3.50 (-22.56; 15.56)   | NS | 6.00 (1.41)        | 4.50 (0.70)  | 1.50 (-4.85; 7.85)      | NS | 1.40 (-1.79; 4.59)        | NS |
| Sleep           | 3.50 (1.00)   | 3.66 (1.23)  | -0.17 (-0.69; 0.36)     | NS | 3.33 (1.50)        | 3.44 (1.13)  | -0.11 (-1.47; 1.24)     | NS | 0.22 (-0.87; 1.32)        | NS |
| Stress          | 3.91 (1.67)   | 3.33 (1.37)  | 0.58 (-0.33; 1.50)      | NS | 3.78 (0.97)        | 3.22 (1.48)  | 0.55 (-0.78; 1.89)      | NS | 0.11 (-1.19; 1.42)        | NS |
| Fatigue         | 4.83 (1.40)   | 4.25 (0.86)  | 0.58 (-0.33; 1.50)      | NS | 4.22 (1.78)        | 4.11 (1.16)  | 0.11 (-1.18; 1.14)      | NS | 0.14 (-0.79; 1.06)        | NS |
| Muscle soreness | 3.58 (1.67)   | 4.17 (1.27)  | -0.58 (-1.41; 0.25)     | NS | 4.00 (1.93)        | 4.11 (1.27)  | -0.11 (-1.93; 1.71)     | NS | 0.55 (-1.11; 1.22)        | NS |
| Wellness        | 15.83 (3.66)  | 15.41 (3.03) | 0.41 (-1.43; 2.26)      | NS | 15.33 (2.87)       | 14.89 (3.48) | 0.44 (-3.12; 4.01)      | NS | 0.52 (-2.55; 3.61)        | NS |

CI, confidence interval; ES, effect size; NS, non-significant; SD, standard deviation; \*p < 0.05
